# Supplementary material
Source: publisher site journal article supplement (https://www.dovepress.com/article/491298)
Supplement: Supplementary file 1 [file get_supplementary_file.php]

**
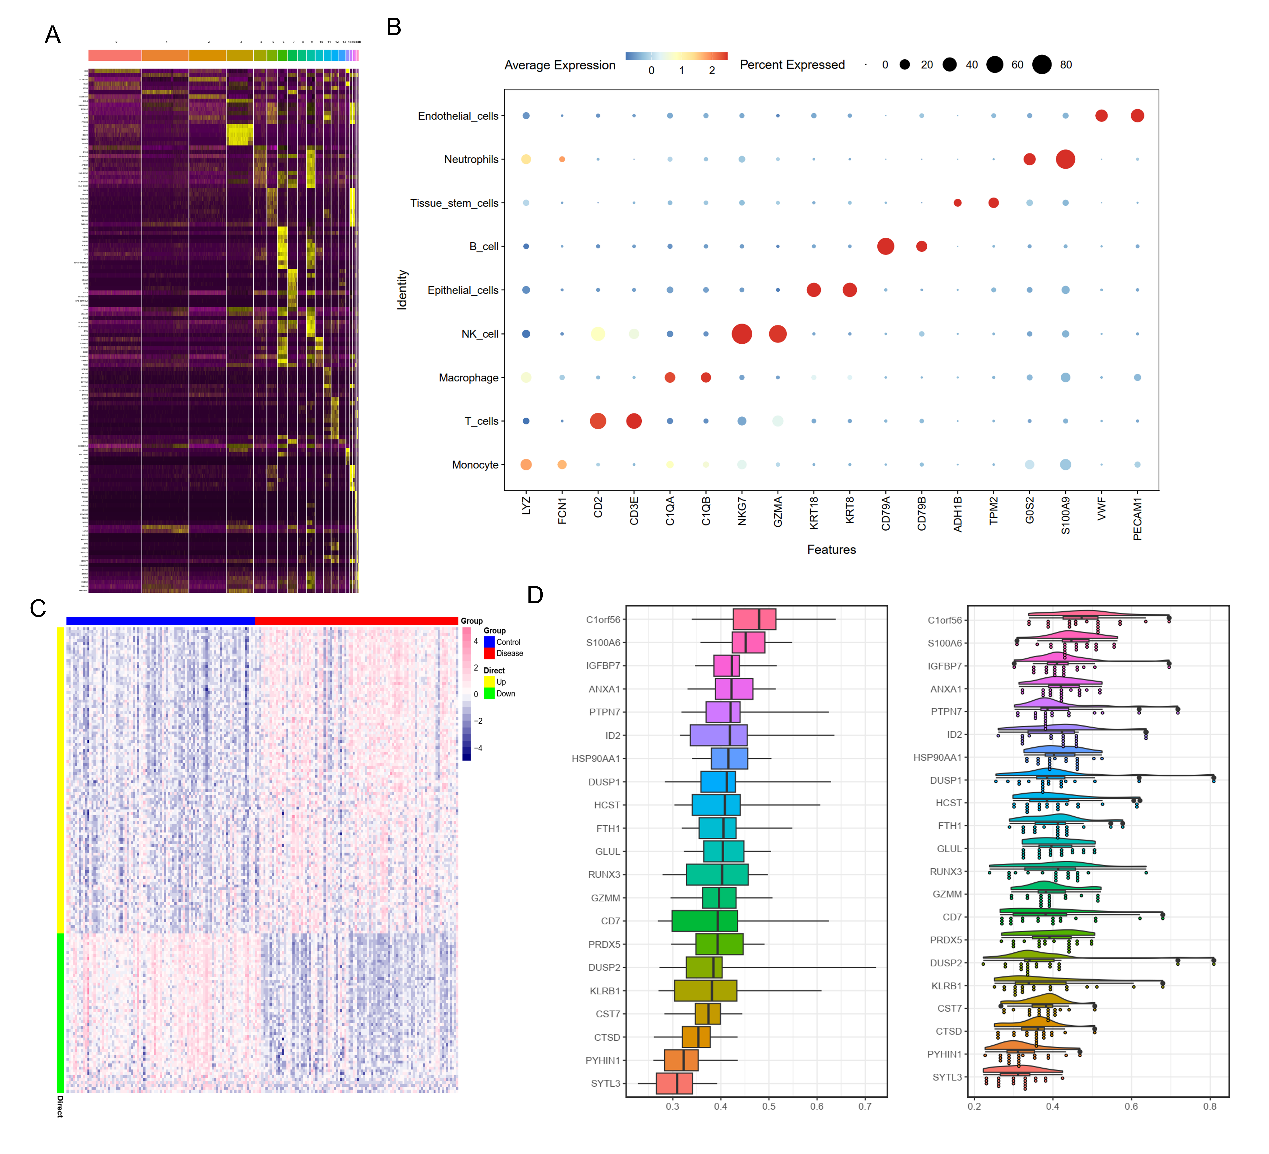
**

**Figure S1. The network of the hub genes. (A)**The heatmap showed 10 marker genes with the most obvious expression levels. Yellow represents high expressed genes and purple represents low expressed genes. **(B)**The bubble chart showed cell classification of single cells in COPD database. **(C)** The heatmap showed 161differential genes. **(D)** GO semantic similarity showed the whole network of the hub genes.


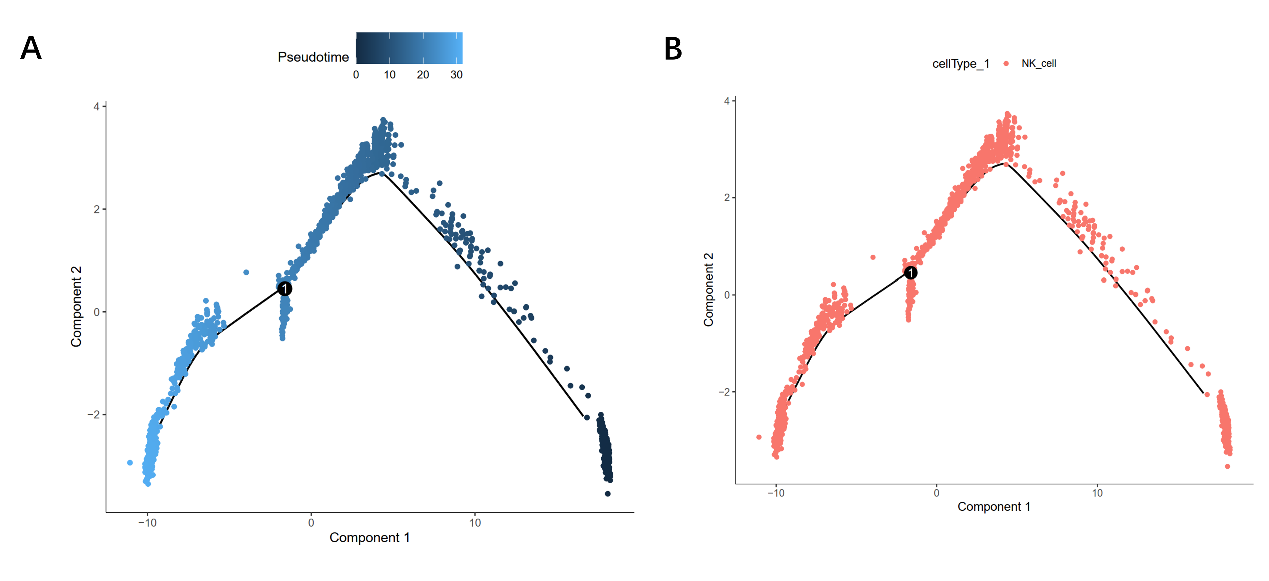


**Figure S2. Trajectory analysis of of NK cells. (A)**Pseudo time value and **(B)** cell type on the image of the cell differentiation trajectory image of NK cells


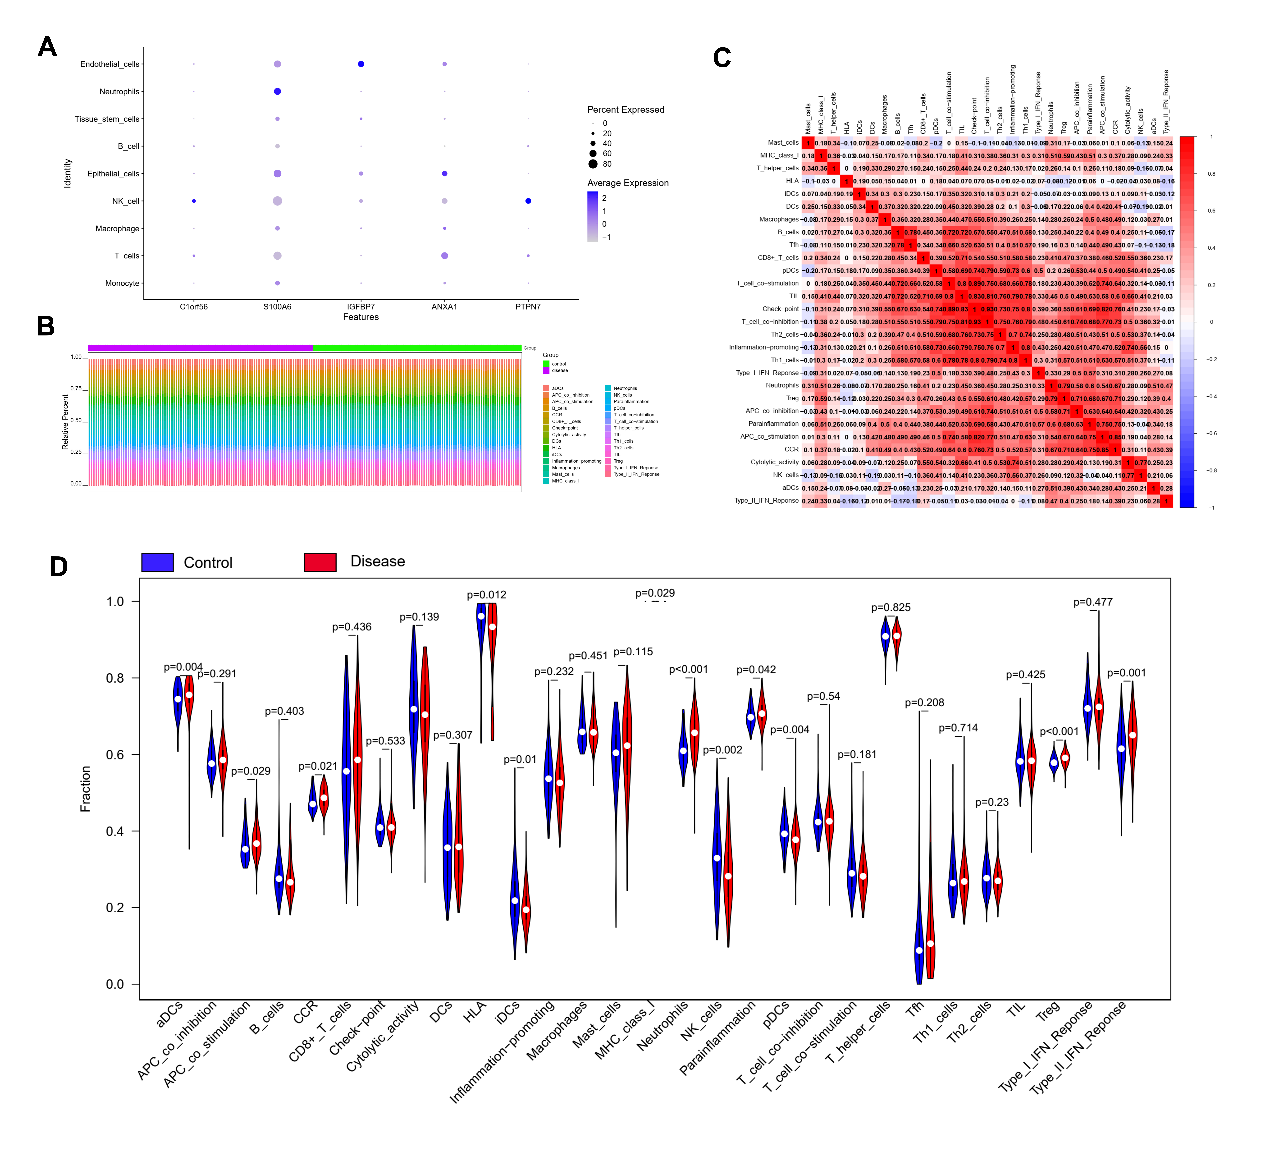


**Figure S3.** **Relationship of hub genes with immune cells.** **(A)** Bubble plot of the expression of the hub genes. **(B-C)** The proportion and the correlation of immune cells are shown.

**(D)**The fraction of immune cells in the COPD and controls group. Blue represents healthy controls; red represents COPD patients. ns,no significance; *P < 0.05, **P < 0.01.


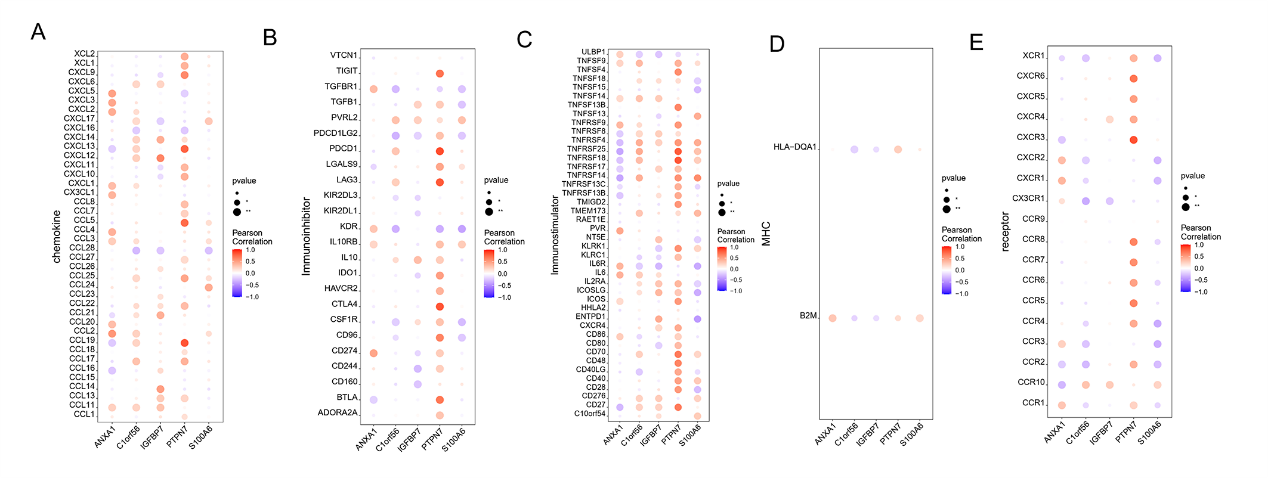


**Figure S4. Relationship of hub genes to other genes.** **(A-E)** Correlation of hub genes in COPD with immunosuppressive factors, immune stimulating factors, chemokines and receptors.
